# Supplementary material for: Full-Length Synaptonemal Complex Grows Continuously during Meiotic Prophase in Budding Yeast
Source: PubMed Central journal article supplement (PMC3469433; doi:10.1371/journal.pgen.1002993), 2012-10-11

**A**

| Genotype                                                  | $\beta$ -estradiol (duration) | 4-spore asci (n) | viable spores (n) |
|-----------------------------------------------------------|-------------------------------|------------------|-------------------|
| WT                                                        | -                             | 57% (123)        | 99% (88)          |
| WT                                                        | + (91 hr)                     | 49% (131)        | 93% (88)          |
| $\frac{P_{GAL1}[ZIP1]}{P_{GAL1}[ZIP1]} \frac{GAL4-ER}{+}$ | -                             | 7% (127)         | 59% (88)          |
| $\frac{P_{GAL1}[ZIP1]}{P_{GAL1}[ZIP1]} \frac{GAL4-ER}{+}$ | + (91 hr)                     | 55% (177)        | 86% (88)          |
| $\frac{P_{GAL1}[ZIP1]}{P_{GAL1}[ZIP1]} \frac{GAL4-ER}{+}$ | + (6 hr)                      | 55% (141)        | 98% (104)         |

**B**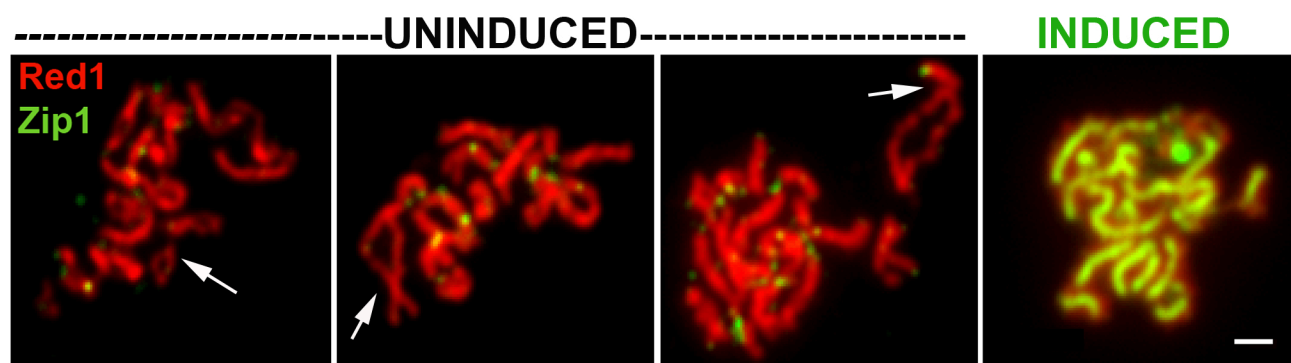

Supplement: pgen.1002993.s001.pdf [file pgen.1002993.s001.pdf]
