# Supplementary material for: Full-Length Synaptonemal Complex Grows Continuously during Meiotic Prophase in Budding Yeast
Source: PubMed Central journal article supplement (PMC3469433; doi:10.1371/journal.pgen.1002993), 2012-10-11

Figure S2

A

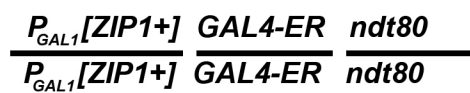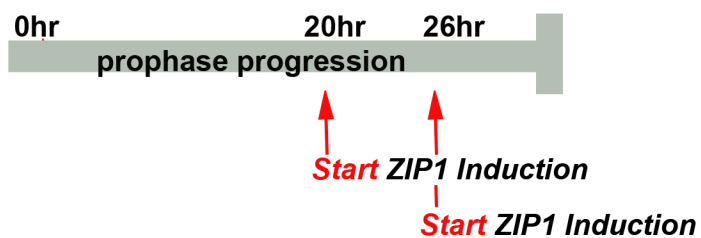

B

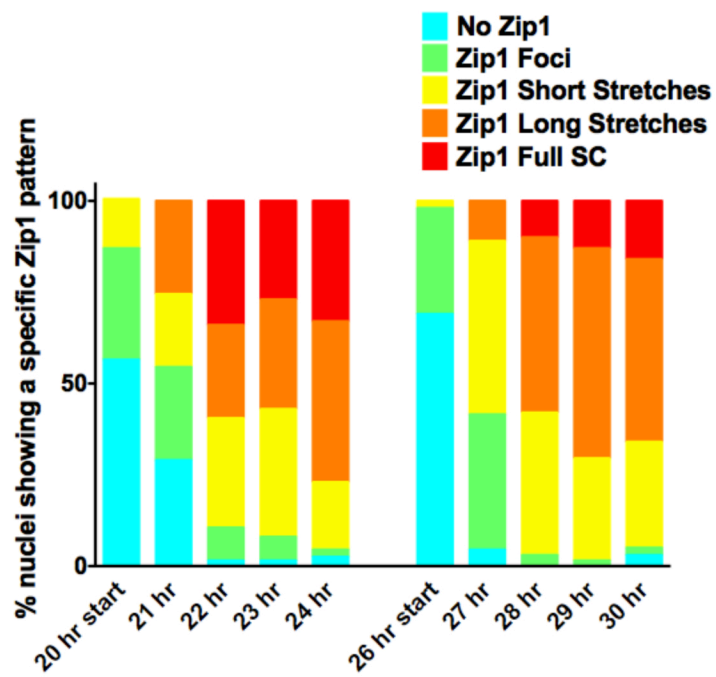

C

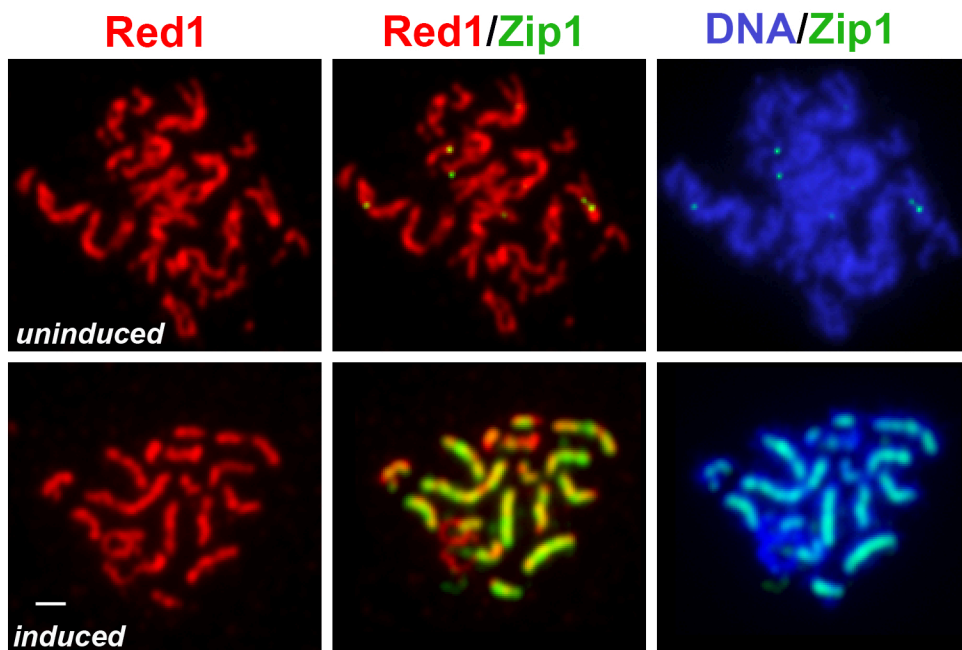

Supplement: pgen.1002993.s002.pdf [file pgen.1002993.s002.pdf]
