# Supplementary material for: Full-Length Synaptonemal Complex Grows Continuously during Meiotic Prophase in Budding Yeast
Source: PubMed Central journal article supplement (PMC3469433; doi:10.1371/journal.pgen.1002993), 2012-10-11

Figure S4

**A**

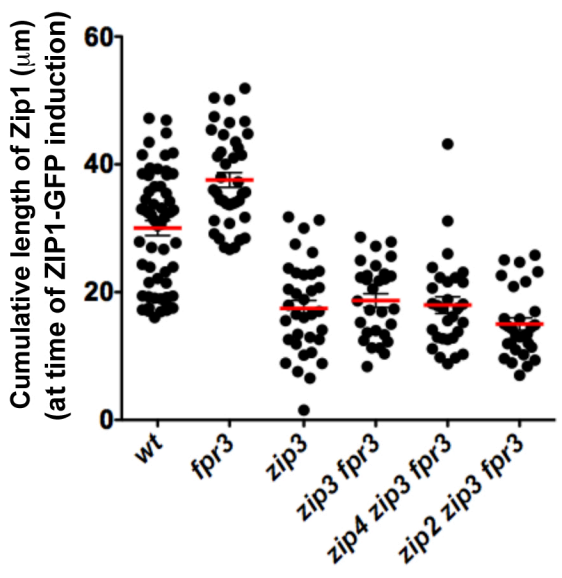

**B**

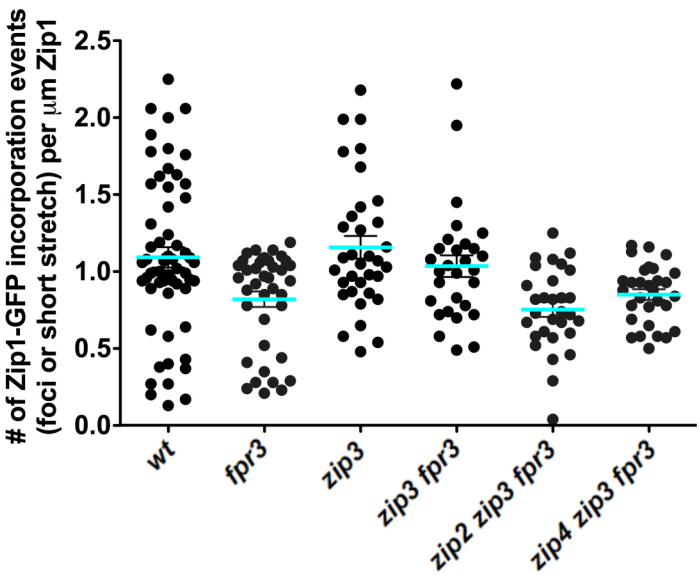

Supplement: pgen.1002993.s004.pdf [file pgen.1002993.s004.pdf]
