# Supplementary material for: Full-Length Synaptonemal Complex Grows Continuously during Meiotic Prophase in Budding Yeast
Source: PubMed Central journal article supplement (PMC3469433; doi:10.1371/journal.pgen.1002993), 2012-10-11
Supplement: pgen.1002993.s007.pdf [file pgen.1002993.s007.pdf]

**Table S1.**

| <b>NAME</b>                                 | <b>GENOTYPE</b>                                                                                                                                                                                                                                                                                                                                                                            |
|---------------------------------------------|--------------------------------------------------------------------------------------------------------------------------------------------------------------------------------------------------------------------------------------------------------------------------------------------------------------------------------------------------------------------------------------------|
| <b>K39</b>                                  | <u>MAT<math>\alpha</math></u> <u>TRP1-P<sub>GALI</sub>-ZIP1-GFP</u> <u>ura3-1</u> <u>ndt80<math>\Delta</math>::LEU2</u><br>MATA ZIP1 ura3::P <sub>GPD1</sub> -GAL4(848).ER::URA3 ndt80 $\Delta$ ::LEU2<br><br>CTF19-c-MYC::kanMX4 his4-260,519 leu2-3,112 trp1-289 ade2-1 thr1-4 lys2 $\Delta$ Nhe<br>CTF19-c-MYC::kanMX4 his4-260,519 leu2-3,112 trp1-289 ade2-1 thr1-4 lys2 $\Delta$ Nhe |
| <b>K29</b>                                  | K39 TRP1-P <sub>GALI</sub> -ZIP1/zip1-4LA lys2 $\Delta$ Nhe/LYS2                                                                                                                                                                                                                                                                                                                           |
| <b>K30</b>                                  | K39 TRP1-P <sub>GALI</sub> -ZIP1-GFP/zip1-4LA lys2 $\Delta$ Nhe/LYS2                                                                                                                                                                                                                                                                                                                       |
| <b>K40</b>                                  | K39 TRP1-P <sub>GALI</sub> -ZIP1/TRP1-P <sub>GALI</sub> -ZIP1                                                                                                                                                                                                                                                                                                                              |
| <b>K48</b>                                  | K39 ZIP3/ ZIP3-c-MYC                                                                                                                                                                                                                                                                                                                                                                       |
| <b>K59</b>                                  | K39 zip3 $\Delta$ ::LYS2/zip3 $\Delta$ ::LYS2                                                                                                                                                                                                                                                                                                                                              |
| <b>K62</b>                                  | K40 CTF19/CTF19 NDT80/NDT80                                                                                                                                                                                                                                                                                                                                                                |
| <b>K83</b>                                  | K39 zip3 $\Delta$ ::LYS2/zip3 $\Delta$ ::LYS2 fpr3 $\Delta$ ::kanMX4/fpr3 $\Delta$ ::kanMX4                                                                                                                                                                                                                                                                                                |
| <b>K84</b>                                  | K39 fpr3 $\Delta$ ::kanMX4/fpr3 $\Delta$ ::kanMX4                                                                                                                                                                                                                                                                                                                                          |
| <b>K91</b>                                  | K39 zip4 $\Delta$ ::hphMX4/zip4 $\Delta$ ::hphMX4 zip3 $\Delta$ ::LYS2/zip3 $\Delta$ ::LYS2<br>fpr3 $\Delta$ ::kanMX4/fpr3 $\Delta$ ::kanMX4                                                                                                                                                                                                                                               |
| <b>K92</b>                                  | K39 zip2 $\Delta$ ::hphMX4/zip2 $\Delta$ ::hphMX4 zip3 $\Delta$ ::LYS2/zip3 $\Delta$ ::LYS2<br>fpr3 $\Delta$ ::kanMX4/fpr3 $\Delta$ ::kanMX4                                                                                                                                                                                                                                               |
| <b>K117</b>                                 | K39 pch2 $\Delta$ ::hphMX4/pch2 $\Delta$ ::hphMX4 CTF19/CTF19                                                                                                                                                                                                                                                                                                                              |
| <b>AM2560</b>                               | K39 pph3 $\Delta$ ::kanMX4/pph3 $\Delta$ ::kanMX4 ndt80 $\Delta$ ::hphMX4/ndt80 $\Delta$ ::hphMX4                                                                                                                                                                                                                                                                                          |
| <b>K139 haploid a/<math>\alpha</math></b>   | <u>MAT<math>\alpha</math></u> <u>TRP1-P<sub>GALI</sub>-ZIP1-GFP</u> <u>ura3::P<sub>GPD1</sub>-GAL4(848).ER::URA3</u> <u>ndt80<math>\Delta</math>::hphMX4</u><br>CTF19-c-MYC::kanMX4 <u>MATA@THR1</u> his4-260,519 leu2-3,112 trp1-289 ade2-1<br>lys2 $\Delta$ Nhe R1589 (pUC18 lacZ' CEN4 ARS1 LEU2 ZIP1)                                                                                  |
| <b>AM2632 haploid a/<math>\alpha</math></b> | <u>MAT<math>\alpha</math></u> <u>Zip3-GFP::URA3</u> <u>Ctf19-c-MYC::kanMX4</u> <u>ndt80<math>\Delta</math>::hphMX4</u> <u>MATA@THR1</u><br>his4-260,519 leu2-3,112 trp1-289 ade2-1 lys2 $\Delta$ Nhe R1589 (pUC18 lacZ' CEN4 ARS1<br>LEU2 ZIP1)                                                                                                                                            |
| <b>K150 haploid a/<math>\alpha</math></b>   | K139 ZIP3-c-MYC CTF19                                                                                                                                                                                                                                                                                                                                                                      |
| <b>SM170</b>                                | <u>MAT<math>\alpha</math></u> <u>TRP1-P<sub>GALI</sub>-ZIP1</u> <u>ura3-1</u> <u>ndt80<math>\Delta</math>::LEU2</u><br>MATA ZIP1-YFP ura3::P <sub>GPD1</sub> -GAL4(848).ER::URA3 ndt80 $\Delta$ ::LEU2<br><br>his4-260,519 leu2-3,112 trp1-289 ade2-1 thr1-4 lys2 $\Delta$ Nhe<br>his4-260,519 leu2-3,112 trp1-289 ade2-1 thr1-4 lys2 $\Delta$ Nhe                                         |
| <b>SM176</b>                                | SM170 ZIP1-YFP/ZIP1-YFP                                                                                                                                                                                                                                                                                                                                                                    |
| <b>SM224</b>                                | SM176 ndt80 $\Delta$ ::hphMX4/ndt80 $\Delta$ ::hphMX4 leu2::ZIP1-YFP::LEU2/leu2-3,112                                                                                                                                                                                                                                                                                                      |
| <b>SM232</b>                                | SM224 leu2::ZIP1-YFP::LEU2/ leu2::ZIP1-YFP::LEU2                                                                                                                                                                                                                                                                                                                                           |
| <b>SM240</b>                                | SM170 TRP1-P <sub>GALI</sub> -ZIP1-YFP/TRP1-P <sub>GALI</sub> -ZIP1-YFP ndt80 $\Delta$ ::hphMX4/ndt80 $\Delta$ ::hphMX4<br>leu2::ZIP1-YFP::LEU2/leu2-3,112                                                                                                                                                                                                                                 |
| <b>SM248</b>                                | SM170 TRP1-P <sub>GALI</sub> -ZIP1/TRP1-P <sub>GALI</sub> -ZIP1 ndt80 $\Delta$ ::hphMX4/ndt80 $\Delta$ ::hphMX4<br>leu2::ZIP1-YFP::LEU2/leu2-3,112                                                                                                                                                                                                                                         |

|               |                                                                                                                                                                                                  |
|---------------|--------------------------------------------------------------------------------------------------------------------------------------------------------------------------------------------------|
| <b>AM2614</b> | <i>MATa</i> $\alpha$ <i>zip1</i> $\Delta$ :: <i>natMX4</i> / <i>zip1</i> $\Delta$ :: <i>natMX4</i> <i>leu2</i> :: <i>ZIP1-YFP</i> :: <i>LEU2</i> / <i>leu2</i> :: <i>ZIP1-YFP</i> :: <i>LEU2</i> |
| <b>AM2648</b> | SM170 <i>ZIP1-YFP</i> / <i>zip1</i> $\Delta$ :: <i>natMX4</i> <i>NDT80</i> / <i>NDT80</i>                                                                                                        |
| <b>AM2650</b> | AM2648 <i>ZIP1-YFP</i> / <i>ZIP1-YFP</i>                                                                                                                                                         |
| <b>AM2652</b> | AM2650 <i>leu2</i> :: <i>ZIP1-YFP</i> :: <i>LEU2</i> / <i>leu2-3,112</i>                                                                                                                         |
| <b>AM2654</b> | AM2650 <i>leu2</i> :: <i>ZIP1-YFP</i> :: <i>LEU2</i> / <i>leu2</i> :: <i>ZIP1-YFP</i> :: <i>LEU2</i>                                                                                             |
| <b>BR1919</b> | <i>MAT</i> $\alpha$ <u><i>ura3-1 his4-260,519 leu2-3,112 trp1-289 ade2-1 thr1-4</i></u><br><i>MAT</i> $\alpha$ <i>ura3-1 his4-260,519 leu2-3,112 trp1-289 ade2-1 thr1-4</i>                      |
