# Supplementary material for: Full-Length Synaptonemal Complex Grows Continuously during Meiotic Prophase in Budding Yeast
Source: PubMed Central journal article supplement (PMC3469433; doi:10.1371/journal.pgen.1002993), 2012-10-11
Supplement: pgen.1002993.s008.pdf [file pgen.1002993.s008.pdf]

**Table S2**

| Strain                     | Tetrads<br>dissected | Distribution of tetrad types (%) |      |      |      |      | Spore<br>viability (%) |
|----------------------------|----------------------|----------------------------------|------|------|------|------|------------------------|
|                            |                      | 4-sv                             | 3-sv | 2-sv | 1-sv | 0-sv |                        |
| <i>ZIP1-1COPY (AM2648)</i> | 52                   | 37                               | 6    | 7    | 2    | 0    | 88                     |
| <i>ZIP1-2COPY (AM2650)</i> | 52                   | 44                               | 7    | 1    | 0    | 0    | 95                     |
| <i>ZIP1-4COPY (AM2652)</i> | 52                   | 44                               | 6    | 2    | 0    | 0    | 95                     |
| <i>ZIP1-6COPY (AM2654)</i> | 52                   | 44                               | 5    | 3    | 0    | 0    | 95                     |

Viability of spores produced by diploids carrying one to six copies of *ZIP1*. The far right column shows the overall spore viability for each strain. Displayed in the “Distribution of tetrad types” columns are the frequency of tetrads containing four viable spores (4-sv), three viable spores (3-sv), two viable spores (2-sv), one viable spore (1-sv) or no viable spores (0-sv). Strain genotypes are listed in Supplementary Table S1.
